# Supplementary material for: Gene expression and in situ protein profiling of candidate SARS-CoV-2 receptors in human airway epithelial cells and lung tissue
Source: PubMed Central journal article supplement — Eur Respir J. 2020 Sep 3;56(3):2001123. doi: 10.1183/13993003.01123-2020 (PMC7366180; doi:10.1183/13993003.01123-2020), 2020-09-03
Supplement: ERJ-01123-2020.Shareable.pdf [file ERJ-01123-2020.Shareable.pdf]

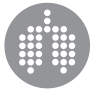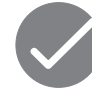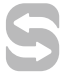

SHAREABLE PDF

# Gene expression and *in situ* protein profiling of candidate SARS-CoV-2 receptors in human airway epithelial cells and lung tissue

Jennifer A. Aguiar<sup>1</sup>, Benjamin J-M. Tremblay<sup>1</sup>, Michael J. Mansfield<sup>2</sup>, Owen Woody<sup>3</sup>, Briallen Lobb<sup>1</sup>, Arinjay Banerjee<sup>4</sup>, Abiram Chandiramohan<sup>5</sup>, Nicholas Tiessen<sup>5</sup>, Quynh Cao<sup>5</sup>, Anna Dvorkin-Gheva<sup>4</sup>, Spencer Revill<sup>5</sup>, Matthew S. Miller<sup>4,6,7</sup>, Christopher Carlsten<sup>8</sup>, Louise Organ<sup>9</sup>, Chitra Joseph<sup>9</sup>, Alison John<sup>9</sup>, Paul Hanson<sup>10</sup>, Richard C. Austin<sup>11</sup>, Bruce M. McManus<sup>10</sup>, Gisli Jenkins<sup>9</sup>, Karen Mossman<sup>4</sup>, Kjetil Ask<sup>4,5</sup>, Andrew C. Doxey<sup>1,5,12</sup> and Jeremy A. Hirota<sup>1,4,5,6,12</sup>

**Affiliations:** <sup>1</sup>Dept of Biology, University of Waterloo, Waterloo, ON, Canada. <sup>2</sup>Genomics and Regulatory Systems Unit, Okinawa Institute of Science and Technology Graduate University, Onna, Japan. <sup>3</sup>Faculty of Mathematics, University of Waterloo, Waterloo, ON, Canada. <sup>4</sup>McMaster Immunology Research Centre, McMaster University, Hamilton, ON, Canada. <sup>5</sup>Firestone Institute for Respiratory Health – Division of Respiriology, Dept of Medicine, McMaster University, Hamilton, ON, Canada. <sup>6</sup>Michael G. DeGroot Institute for Infectious Disease Research, McMaster University, Hamilton, ON, Canada. <sup>7</sup>Dept of Biochemistry and Biomedical Sciences, McMaster University, Hamilton, ON, Canada. <sup>8</sup>Division of Respiratory Medicine, Dept of Medicine, University of British Columbia, Vancouver, BC, Canada. <sup>9</sup>Nottingham NIHR Biomedical Research Centre, Respiratory Research Unit, University of Nottingham, Nottingham, UK. <sup>10</sup>Centre for Heart Lung Innovation, University of British Columbia, Vancouver, BC, Canada. <sup>11</sup>Division of Nephrology, Dept of Medicine, McMaster University, Hamilton, ON, Canada. <sup>12</sup>A.C. Doxey and J.A. Hirota contributed equally to this article as lead authors and supervised the work.

**Correspondence:** Jeremy A. Hirota, Firestone Institute for Respiratory Health – Division of Respiriology, Dept of Medicine, McMaster University, Hamilton, ON, L8N 4A6, Canada. E-mail: [hirotaja@mcmaster.ca](mailto:hirotaja@mcmaster.ca)

@ERSpublications

**ACE2 gene and protein expression is low to absent in airway and alveolar epithelial cells in human lungs. This study suggests the presence of a mechanism dynamically regulating ACE2 expression in human lung or other receptors for SARS-CoV-2.** <https://bit.ly/3f85R11>

**Cite this article as:** Aguiar JA, Tremblay BJ-M, Mansfield MJ, *et al.* Gene expression and *in situ* protein profiling of candidate SARS-CoV-2 receptors in human airway epithelial cells and lung tissue. *Eur Respir J* 2020; 56: 2001123 [<https://doi.org/10.1183/13993003.01123-2020>].

This single-page version can be shared freely online.

**ABSTRACT** In December 2019, severe acute respiratory syndrome coronavirus 2 (SARS-CoV-2) emerged, causing the coronavirus disease 2019 (COVID-19) pandemic. SARS-CoV, the agent responsible for the 2003 SARS outbreak, utilises angiotensin-converting enzyme 2 (ACE2) and transmembrane serine protease 2 (TMPRSS2) host molecules for viral entry. ACE2 and TMPRSS2 have recently been implicated in SARS-CoV-2 viral infection. Additional host molecules including ADAM17, cathepsin L, CD147 and GRP78 may also function as receptors for SARS-CoV-2.

To determine the expression and *in situ* localisation of candidate SARS-CoV-2 receptors in the respiratory mucosa, we analysed gene expression datasets from airway epithelial cells of 515 healthy subjects, gene promoter activity analysis using the FANTOM5 dataset containing 120 distinct sample

types, single cell RNA sequencing (scRNAseq) of 10 healthy subjects, proteomic datasets, immunoblots on multiple airway epithelial cell types, and immunohistochemistry on 98 human lung samples.

We demonstrate absent to low *ACE2* promoter activity in a variety of lung epithelial cell samples and low *ACE2* gene expression in both microarray and scRNAseq datasets of epithelial cell populations. Consistent with gene expression, rare *ACE2* protein expression was observed in the airway epithelium and alveoli of human lung, confirmed with proteomics. We present confirmatory evidence for the presence of TMPRSS2, CD147 and GRP78 protein *in vitro* in airway epithelial cells and confirm broad *in situ* protein expression of CD147 and GRP78 in the respiratory mucosa.

Collectively, our data suggest the presence of a mechanism dynamically regulating *ACE2* expression in human lung, perhaps in periods of SARS-CoV-2 infection, and also suggest that alternative receptors for SARS-CoV-2 exist to facilitate initial host cell infection.
