# Supplementary material for: Gene expression and in situ protein profiling of candidate SARS-CoV-2 receptors in human airway epithelial cells and lung tissue
Source: PubMed Central journal article supplement — Eur Respir J. 2020 Sep 3;56(3):2001123. doi: 10.1183/13993003.01123-2020 (PMC7366180; doi:10.1183/13993003.01123-2020), 2020-09-03
Supplement: ERJ-01123-2020.Table_S2.pdf [file ERJ-01123-2020.Table_S2.pdf]

**Supplement Table 2:** Statistics for impact of smoking status relative to never smokers on gene expression of candidate SARS-CoV-2 receptors (Figure 2C data)

|                   | ACE2 | TMPRSS2 | ADAM17 | CTSL | CD147 | GRP78 | CDH1 |
|-------------------|------|---------|--------|------|-------|-------|------|
| Current vs Former | ***  | ***     | *      | ***  | ***   |       | **   |
| Current vs Never  | ***  | **      |        | ***  | ***   | *     | ***  |
| Former vs Never   | *    | **      |        |      | ***   |       | ***  |

0 '\*\*\*\*' 0.001 '\*\*' 0.01 '\*' 0.05 '.' 0.1 '' 1

Results for each individual genes obtained via ANOVA followed by Tukey’s Honestly Significant Difference post-hoc test using the *stats* package in R.
