# Supplementary figures and images for: Gene expression and in situ protein profiling of candidate SARS-CoV-2 receptors in human airway epithelial cells and lung tissue
Source: PubMed Central journal article supplement — Eur Respir J. 2020 Sep 3;56(3):2001123. doi: 10.1183/13993003.01123-2020 (PMC7366180; doi:10.1183/13993003.01123-2020), 2020-09-03

Supplement Figure 2

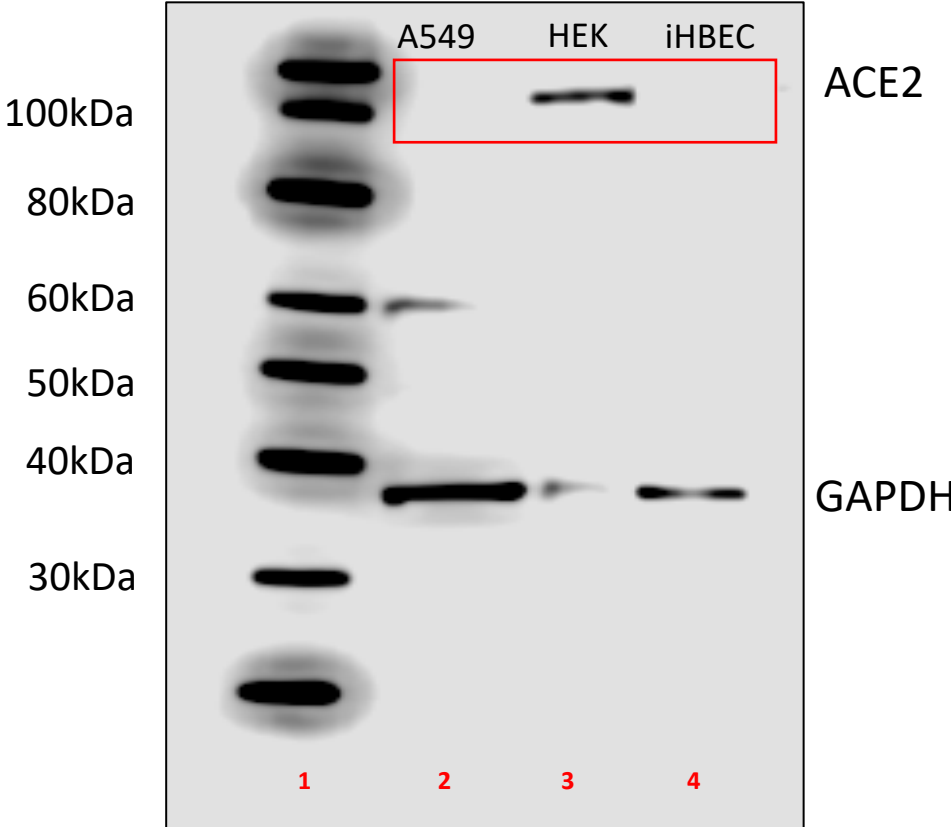

Supplement: ERJ-01123-2020.Figure_S2.pdf [file ERJ-01123-2020.Figure_S2.pdf]

Supplement Figure 7

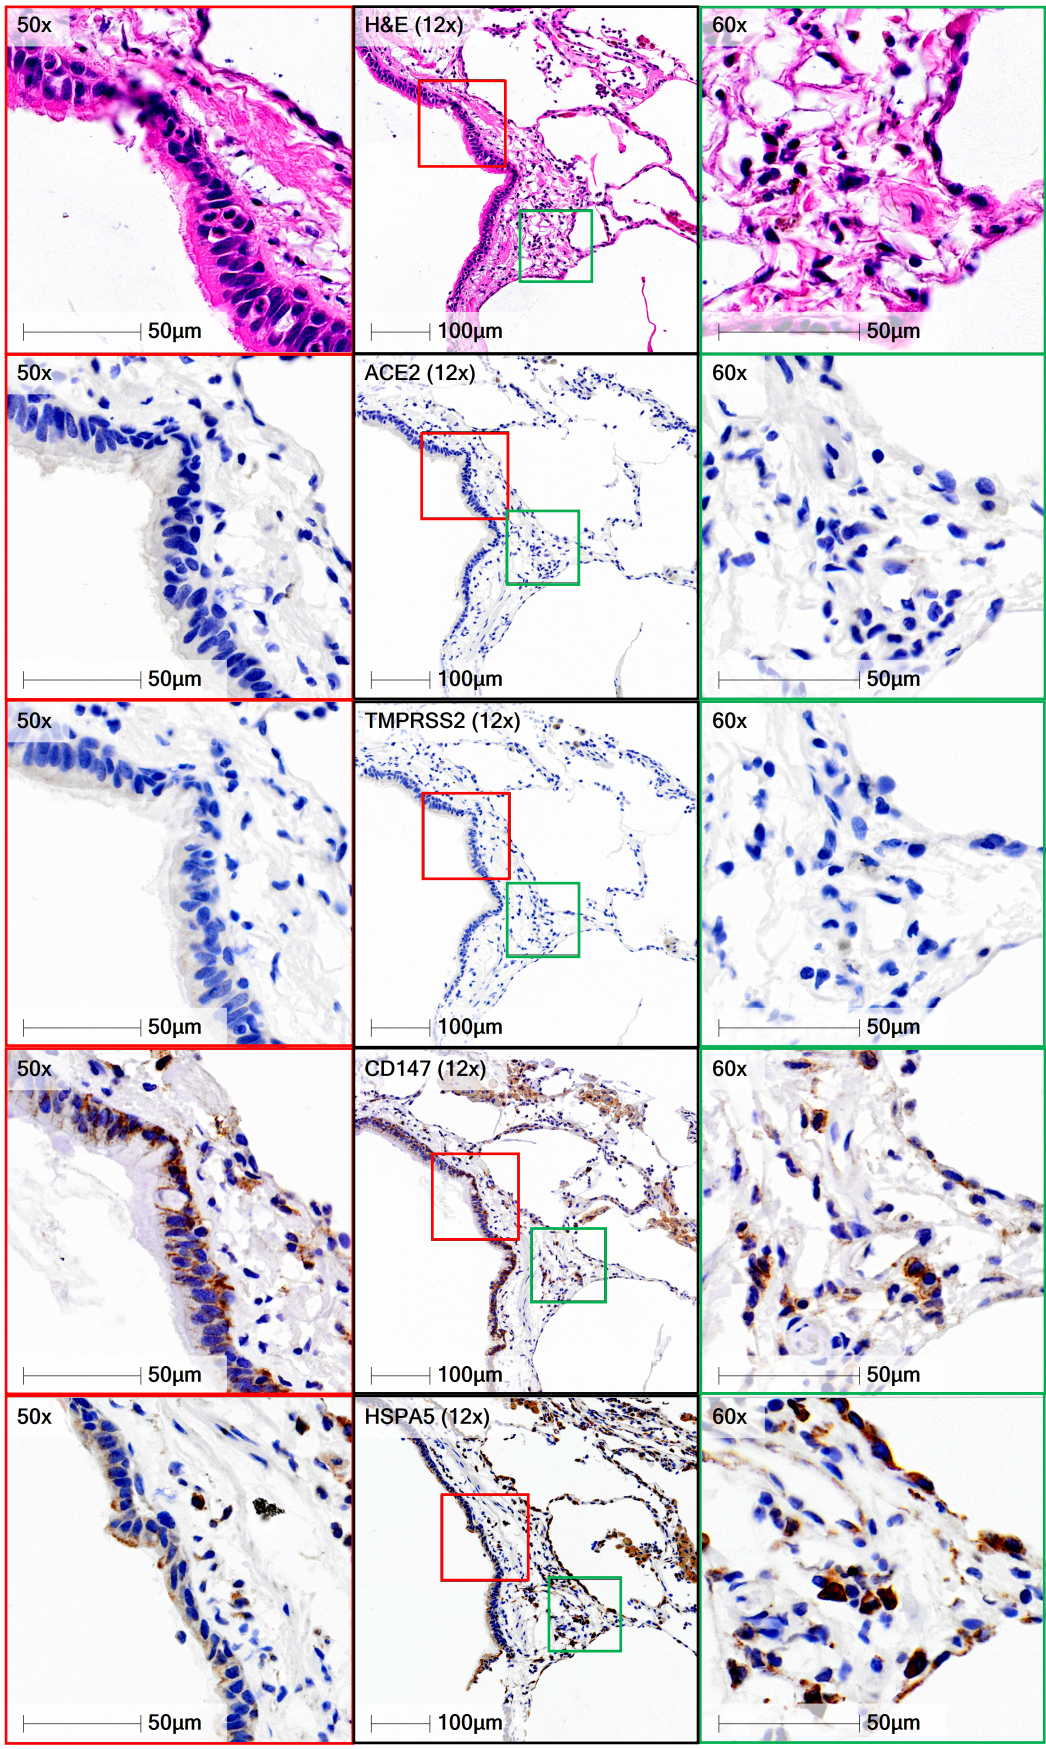

Supplement: ERJ-01123-2020.Figure_S7.pdf [file ERJ-01123-2020.Figure_S7.pdf]
